# Supplementary material for: A highly susceptible hACE2-transgenic mouse model for SARS-CoV-2 research
Source: Frontiers journal article supplement (doi:10.3389/fmicb.2024.1348405), 2024-02-07
Supplement: Image_1.PDF [file Image_1.PDF]

# A highly susceptible hACE2-transgenic mouse model for SARS-CoV-2 research

Gang Liu<sup>1†</sup>, Min Zhang<sup>1†</sup>, Baolei Wu<sup>2†</sup>, Cheng Zhang<sup>3,4</sup>, Yan Wang<sup>5</sup>, Xuelian Han<sup>1</sup>, Rongjuan Wang<sup>6</sup>, Li Li<sup>5</sup>, Yuwei Wei<sup>1</sup>, Yali Sun<sup>1,7</sup>, Xiangwen Cao<sup>1,7</sup>, Yuan Wang<sup>1</sup>, Yalan Li<sup>6</sup>, Min Li<sup>1</sup>, Guangyu Zhao<sup>1,7</sup>, Yuehua Ke<sup>8\*</sup>, Zhendong Guo<sup>3,4\*</sup>, Qi Yin<sup>1\*</sup>, Yansong Sun<sup>1\*</sup>

<sup>1</sup>State Key Laboratory of Pathogen and Biosecurity, Institute of Microbiology and Epidemiology, Academy of Military Medical Sciences, Beijing, China

<sup>2</sup>Vanke School of Public Health, Tsinghua University, Beijing, China

<sup>3</sup>Changchun Veterinary Research Institute, Chinese Academy of Agriculture Sciences, Changchun, Jilin, China

<sup>4</sup>College of Veterinary Medicine, Hebei Agricultural University, 2596 Lucky South Street, Baoding, Hebei, China

<sup>5</sup>SPF (Beijing) Biotechnology Co., Ltd. Beijing, China

<sup>6</sup>Beijing Kohnoor Science & Technology Co. Ltd, Beijing, China

<sup>7</sup>Public Health School, Mudanjiang Medical University, Mudanjiang, China

<sup>8</sup>Department of Bacteriology, Capital Institute of Pediatrics, Beijing, China

## \*Correspondence:

Yansong Sun, sunys@qq.com; Qi Yin, jnyzyinqi@163.com; Zhendong Guo, guozd@foxmail.com; Yuehua Ke, yuehuakebj@163.com

<sup>†</sup>These authors contributed equally to this work and share first authorship.

Supplementary figures.

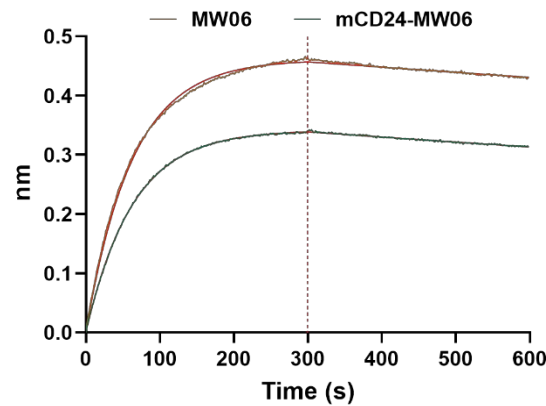

**Supplementary Figure 1.** The binding kinetics of two antibodies to SARS-CoV S1 recombinant proteins measured by BLI.

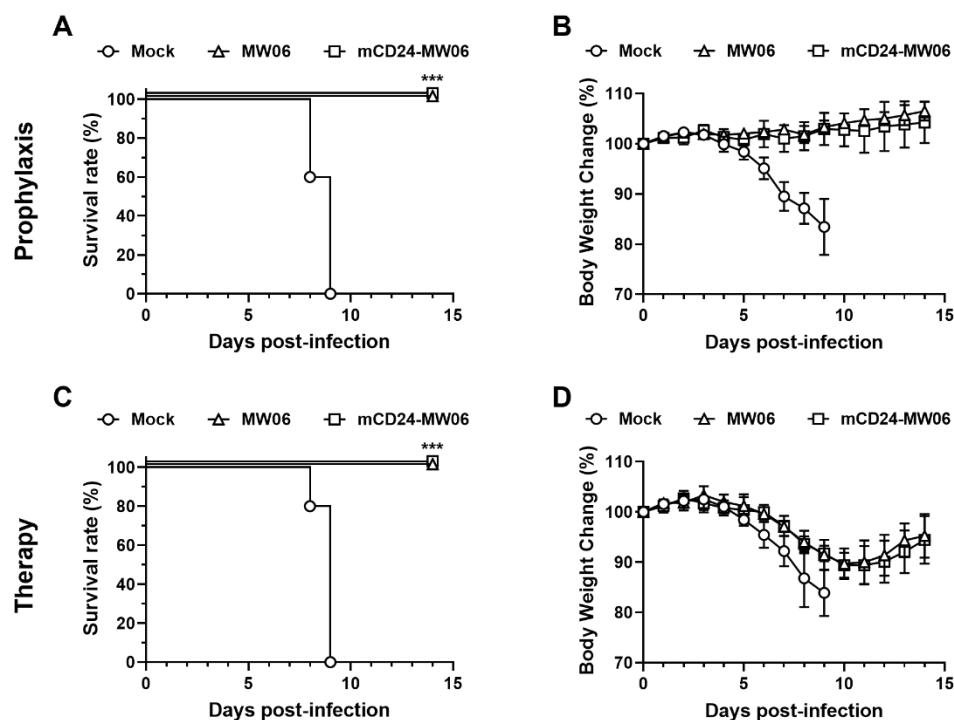

**Supplementary Figure 2.** Prophylactic and therapeutic effects of two antibodies, MW06 (RBD antibodies), and mCD24-MW06 (CD24-conjugated RBD antibodies), against low-dose SARS-CoV-2 infection. **(A)** Survival curve of hACE2-Tg mice treated with MW06 or mCD24-MW06 before SARS-CoV-2 infection. **(B)** Changes of body weight of hACE2-Tg mice treated with MW06 or mCD24-MW06 before SARS-CoV-2 infection. (n=5 per group). **(C)** Survival curve of hACE2-Tg mice treated with MW06 or mCD24-MW06 after SARS-CoV-2 infection. **(D)** Changes of body weight of hACE2-Tg mice treated with MW06 or mCD24-MW06 after SARS-CoV-2 infection. (n=5 per group).
